# Supplementary material
Source: publisher figshare collection journal article supplement (https://tandf.figshare.com/articles/dataset/_/6738725)

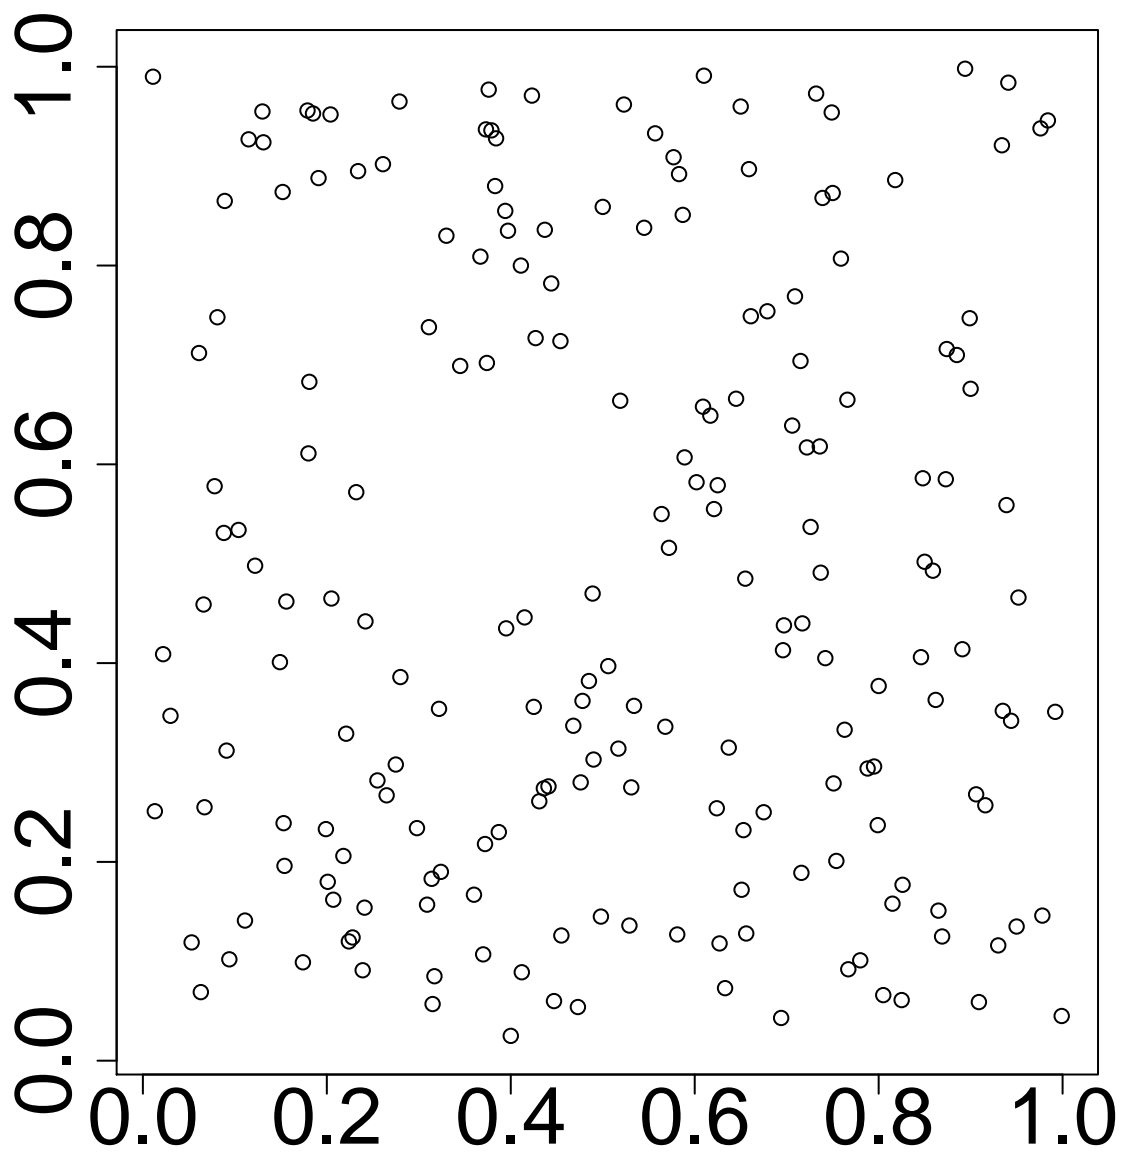

Supplement: Supplementary file 1 [file 2]

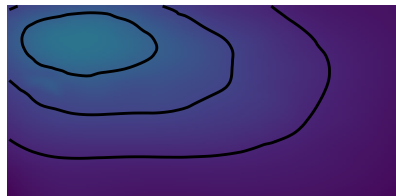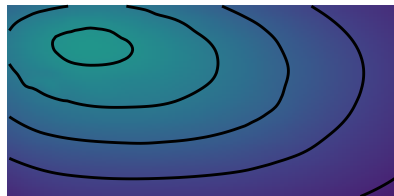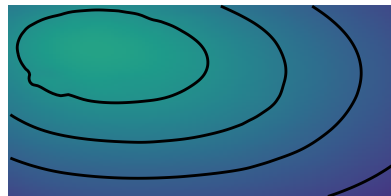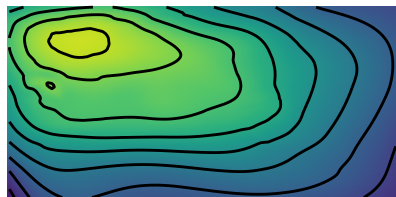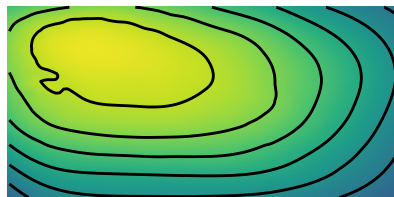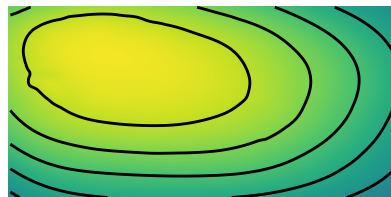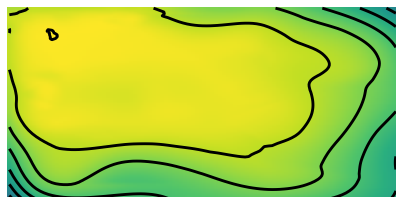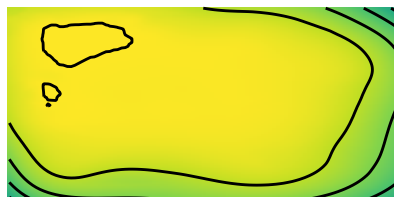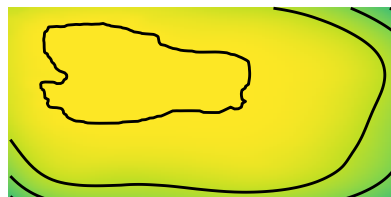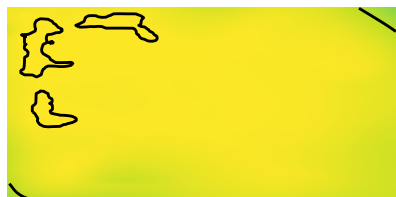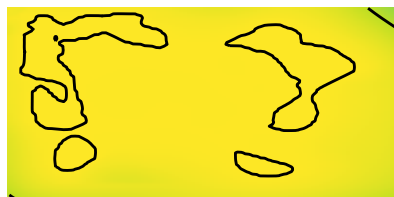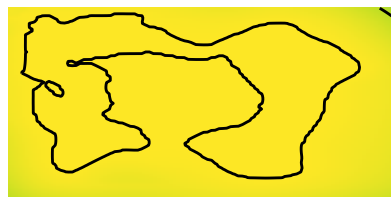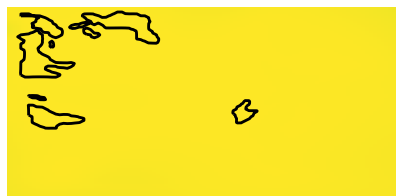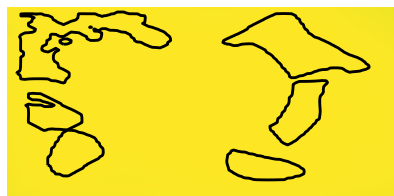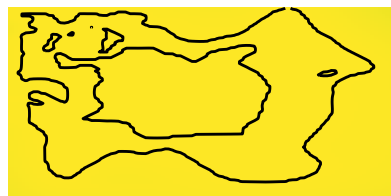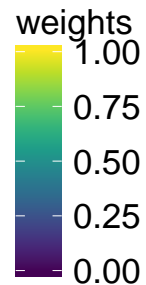

Supplement: Supplementary file 2 [file 2]

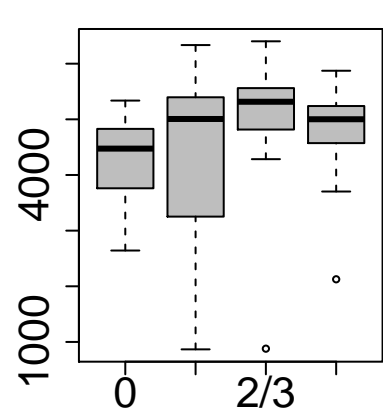

(a)

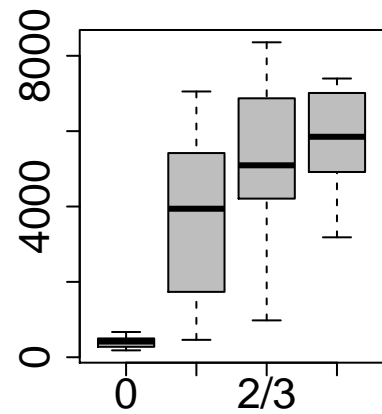

(b)

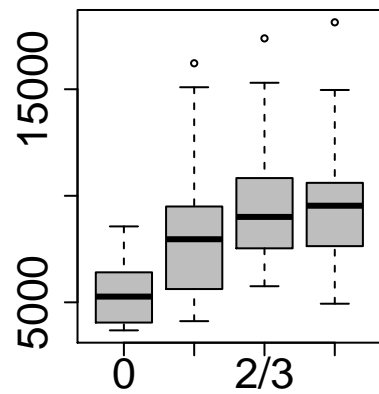

(c)

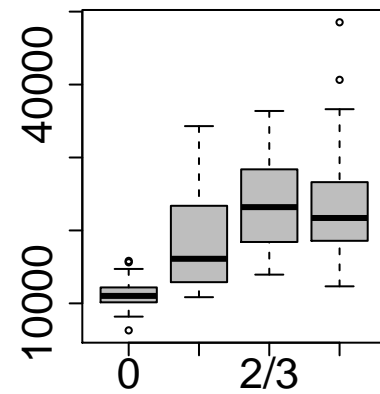

(d)

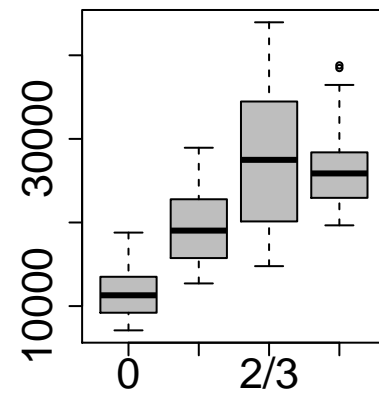

(e)

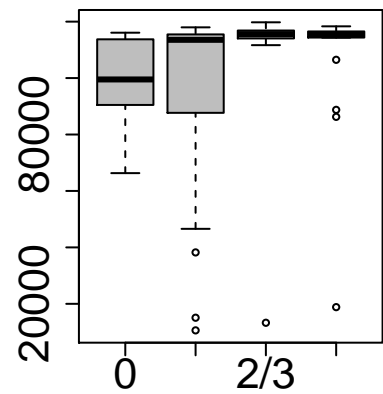

(f)

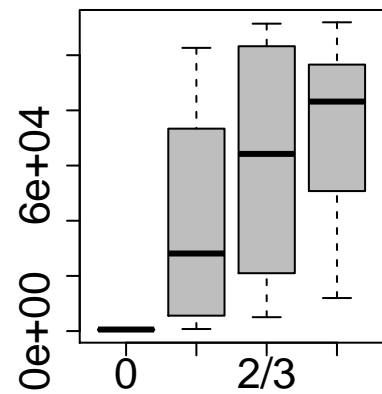

(g)

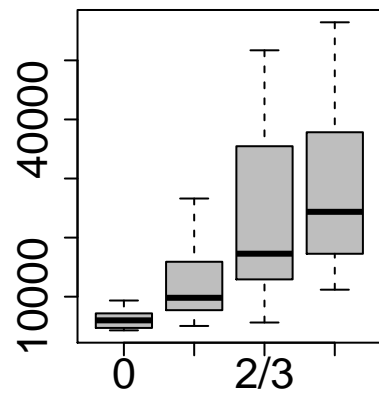

(h)

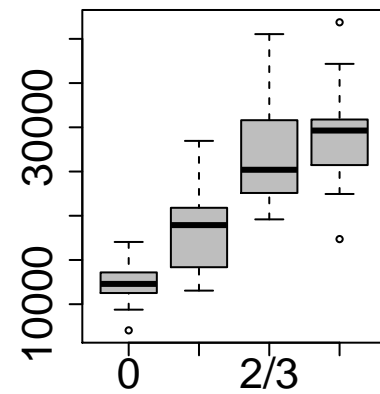

(i)

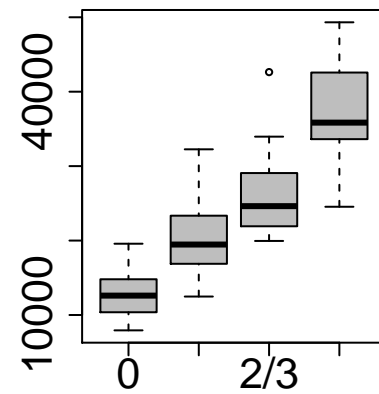

(j)

Supplement: Supplementary file 4 [file 2]

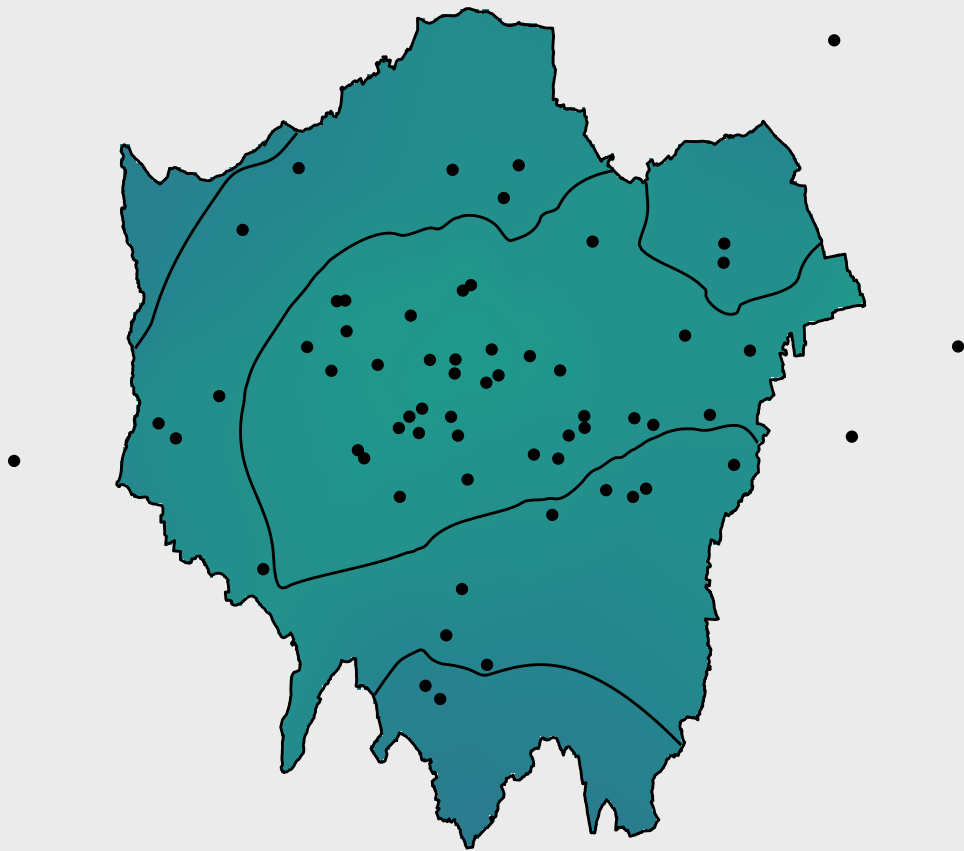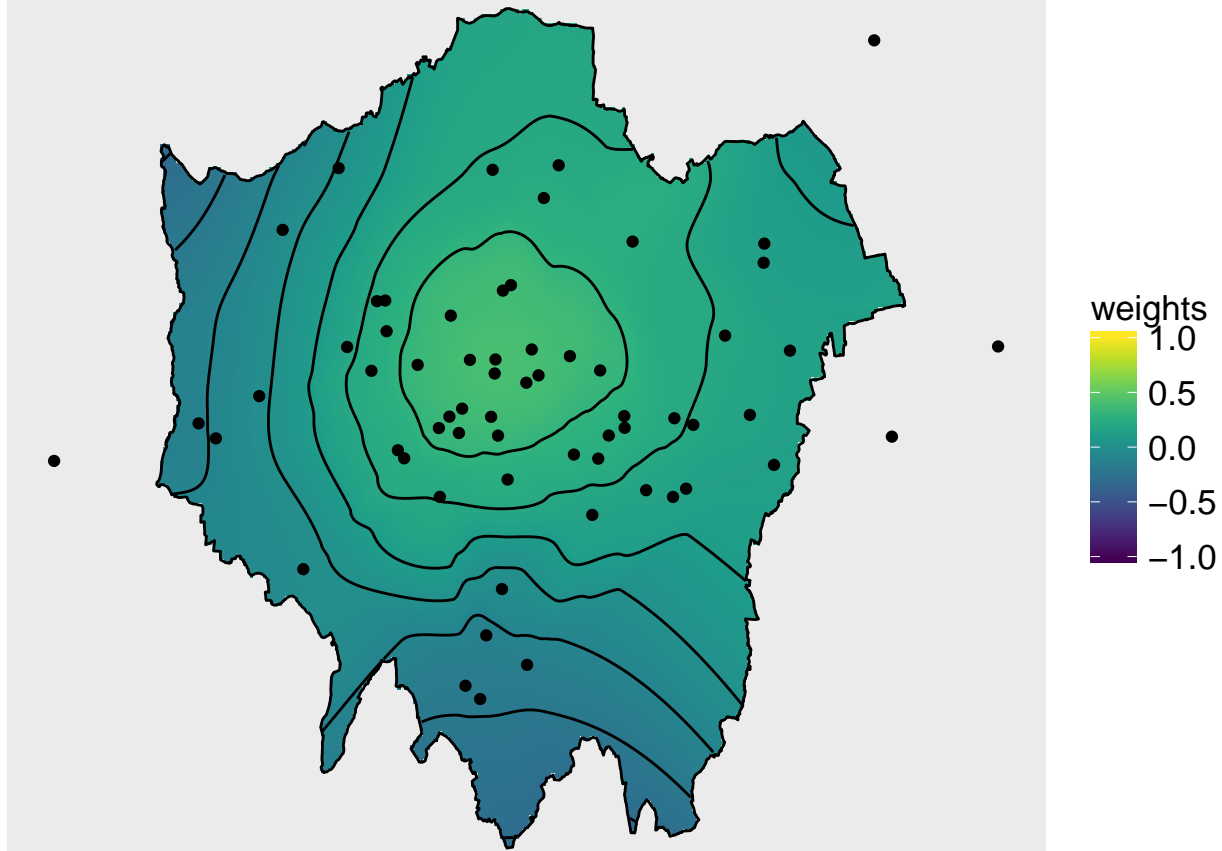

Supplement: Supplementary file 5 [file 2]

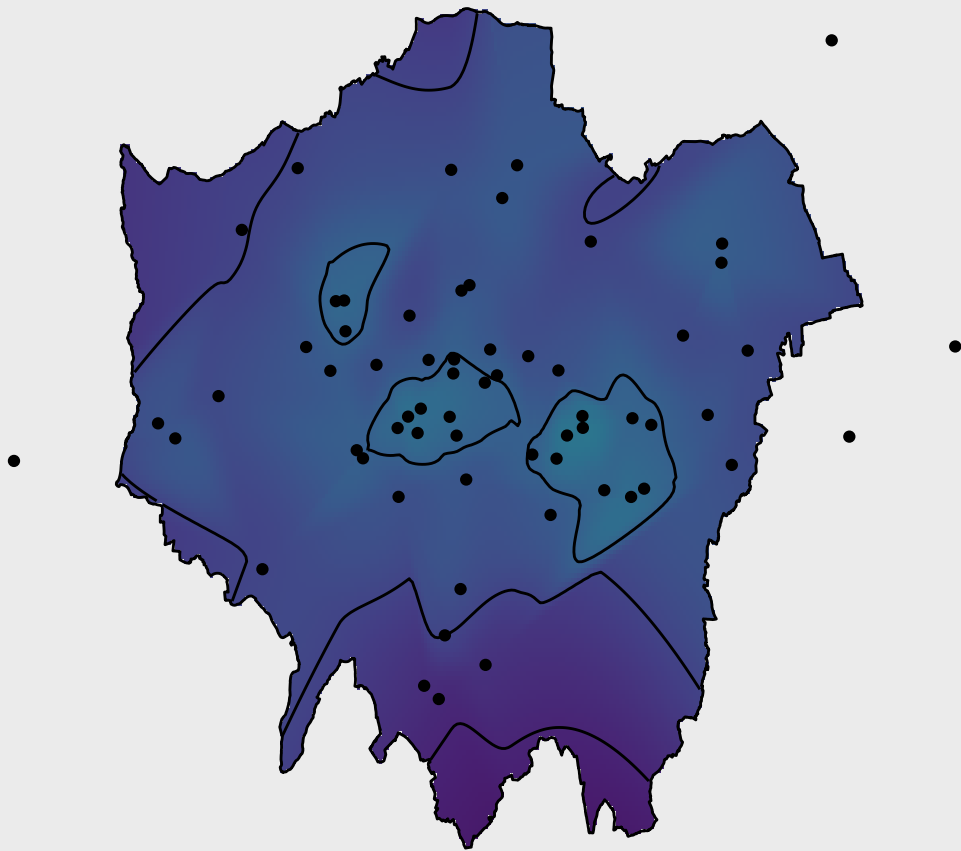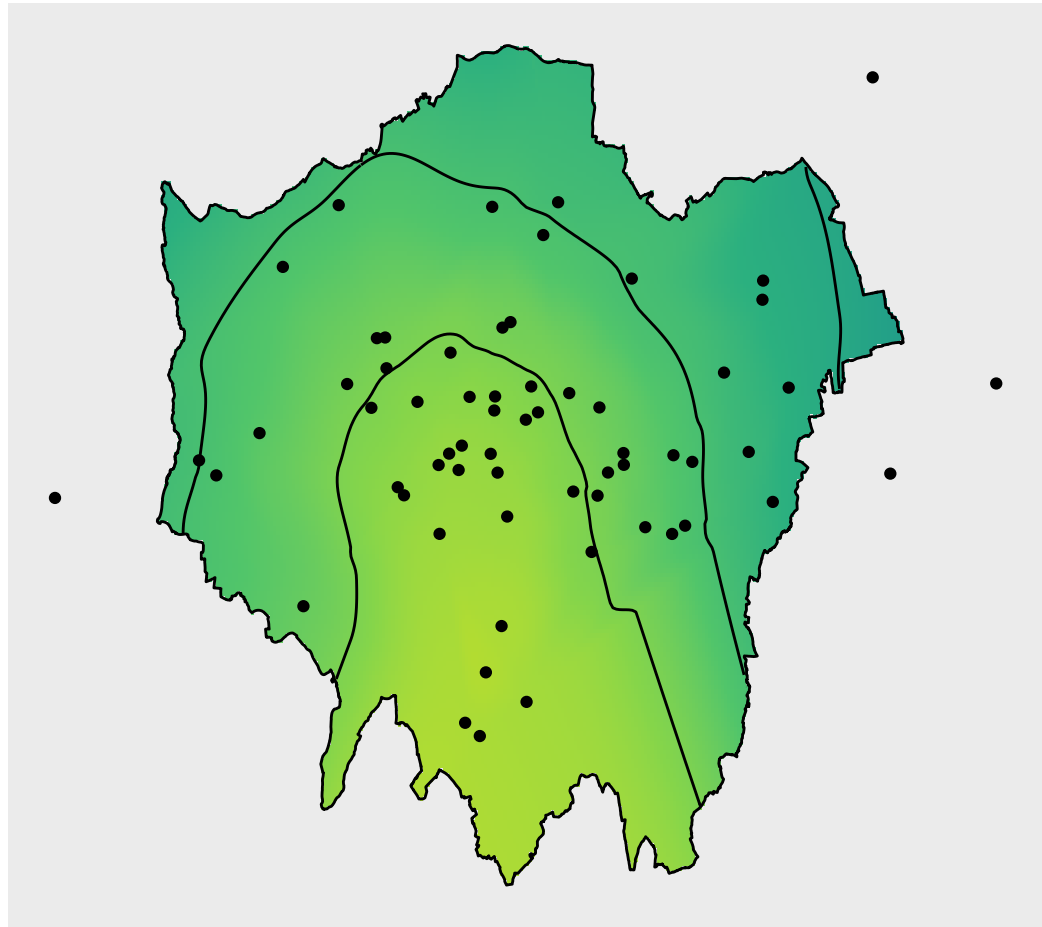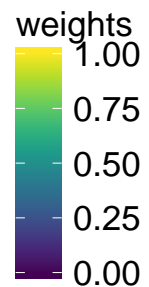

Supplement: Supplementary file 6 [file 2]

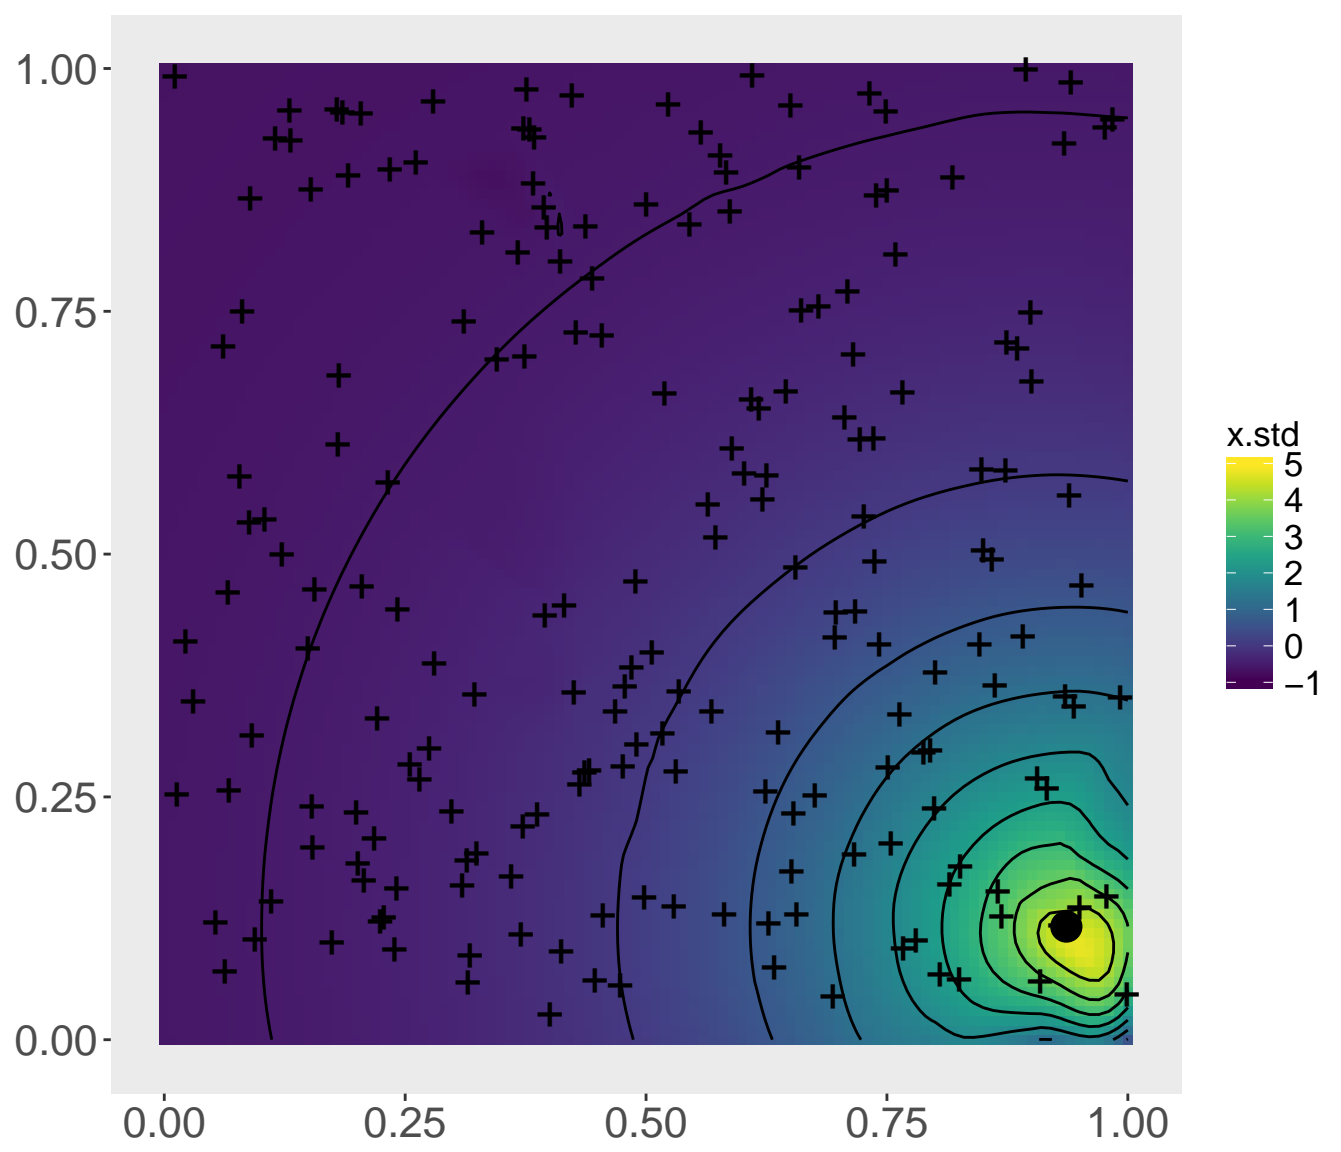

Supplement: Supplementary file 7 [file 2]

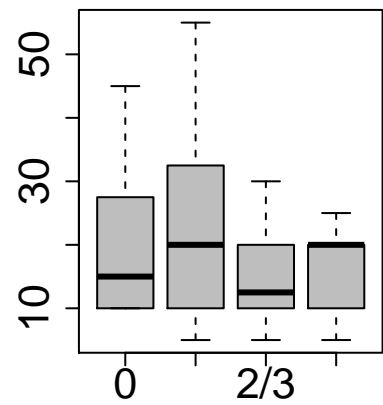

(a)

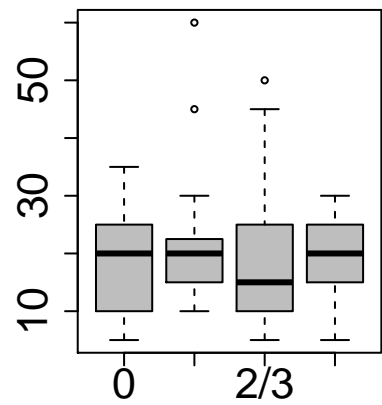

(b)

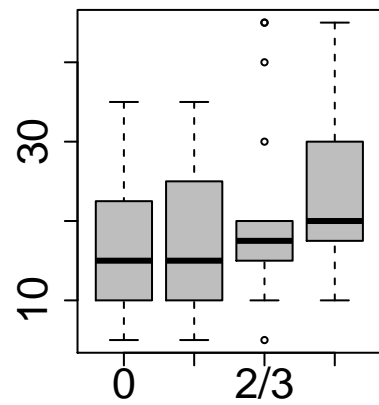

(c)

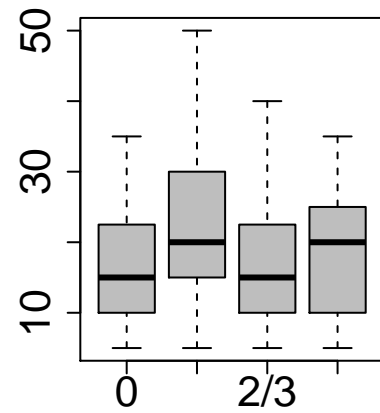

(d)

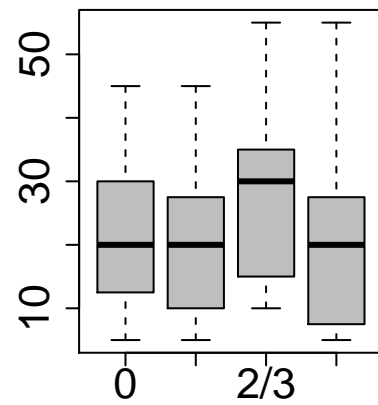

(e)

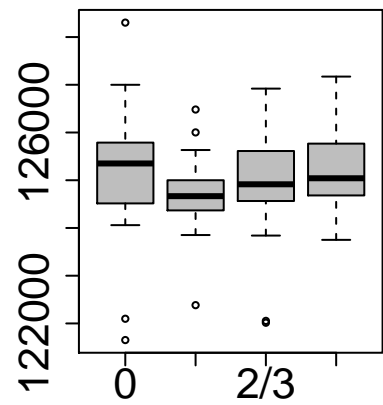

(f)

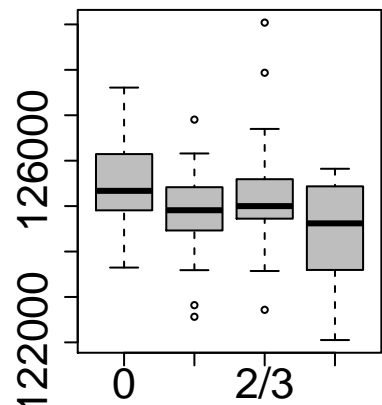

(g)

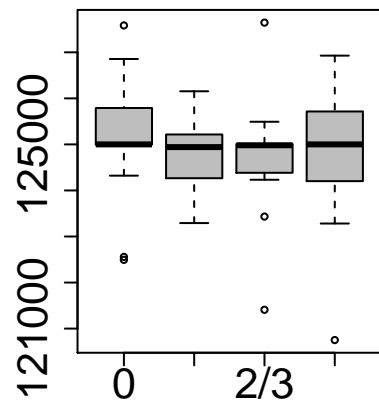

(h)

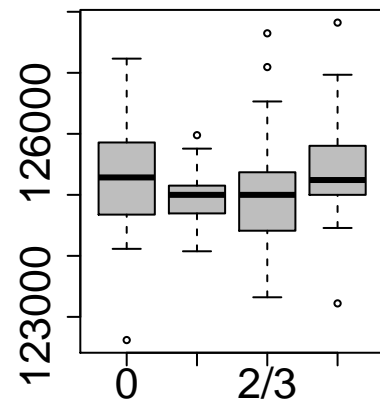

(i)

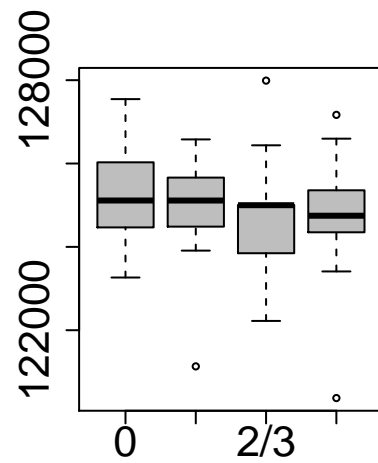

(j)

Supplement: Supplementary file 8 [file 2]

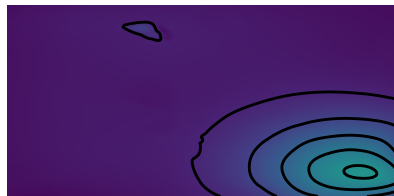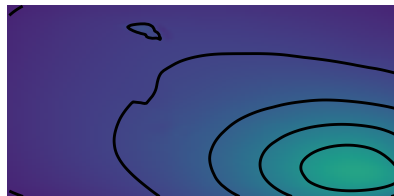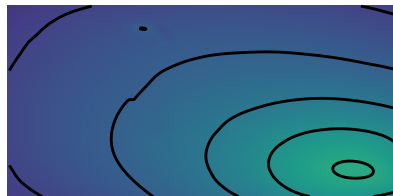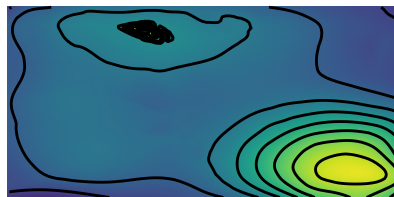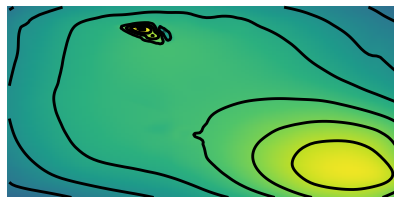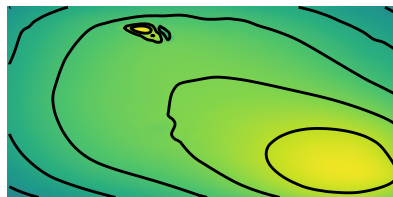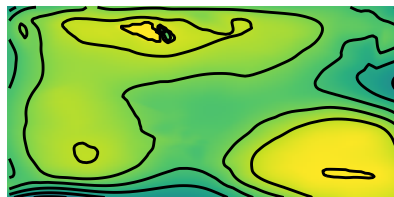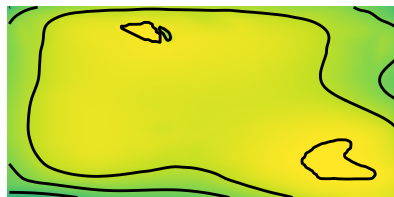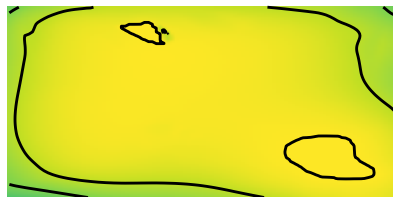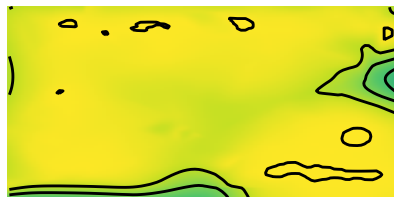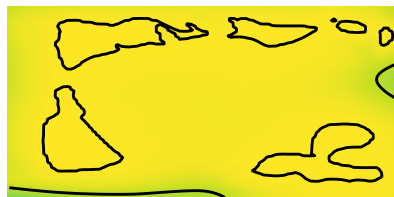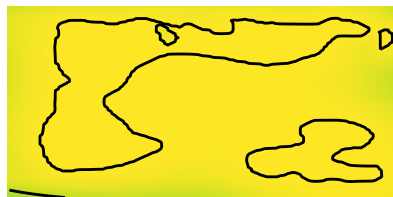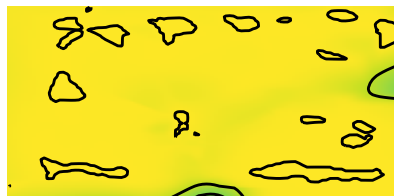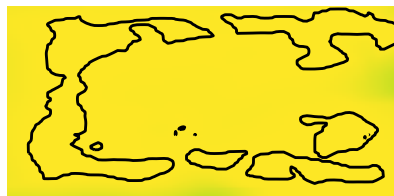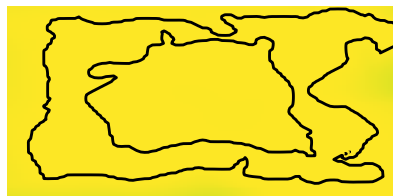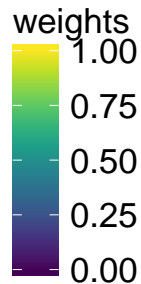

Supplement: Supplementary file 9 [file 2]

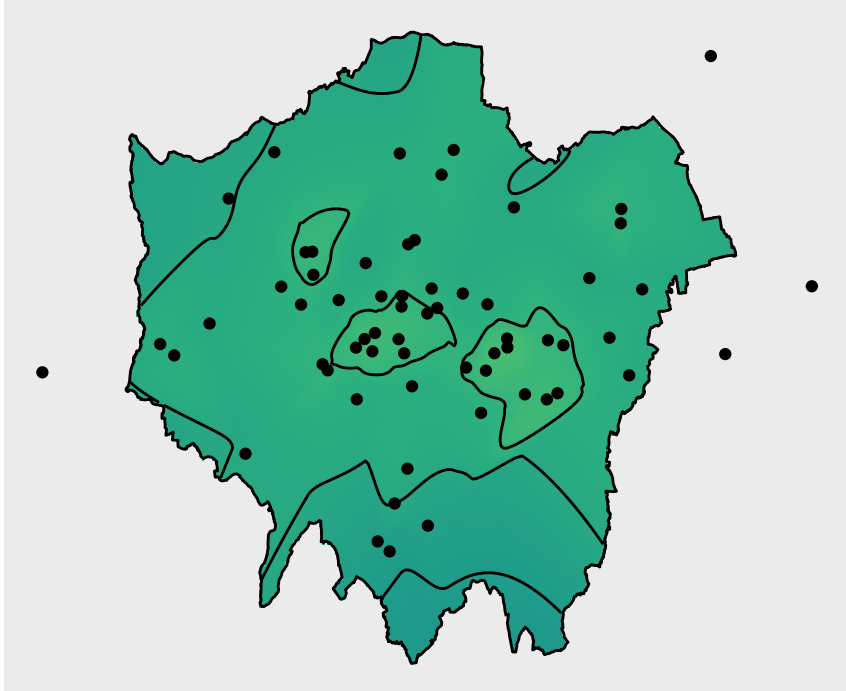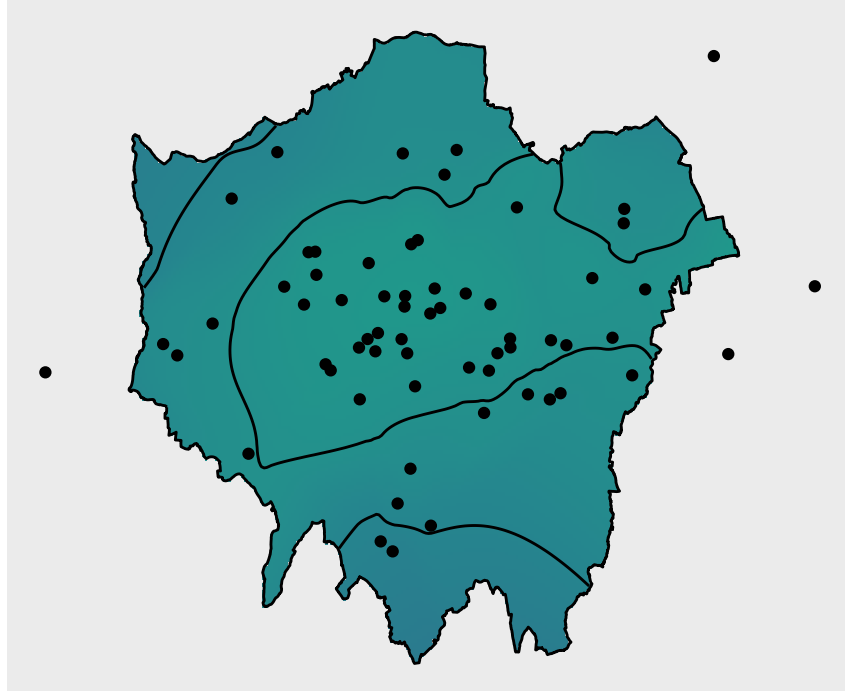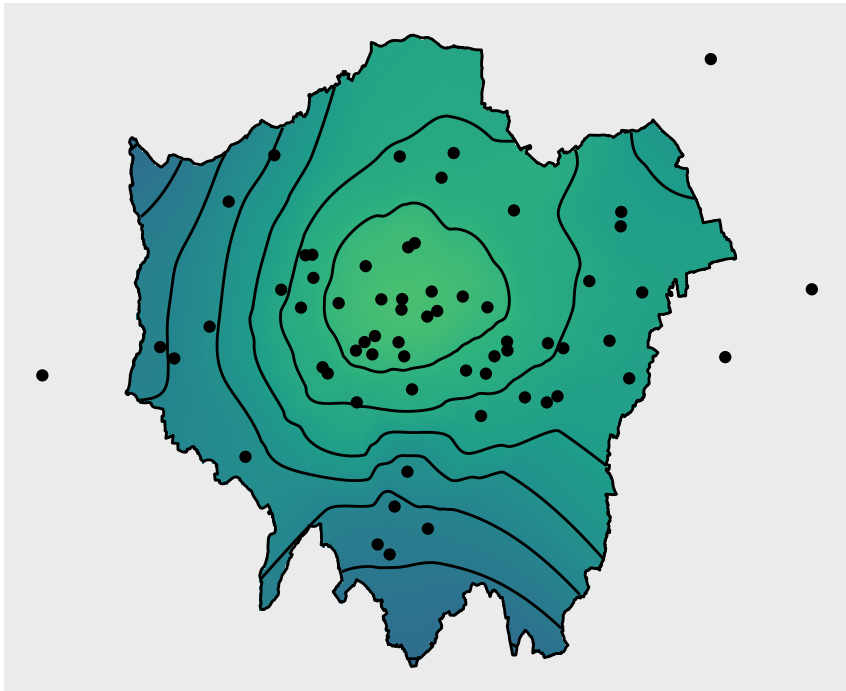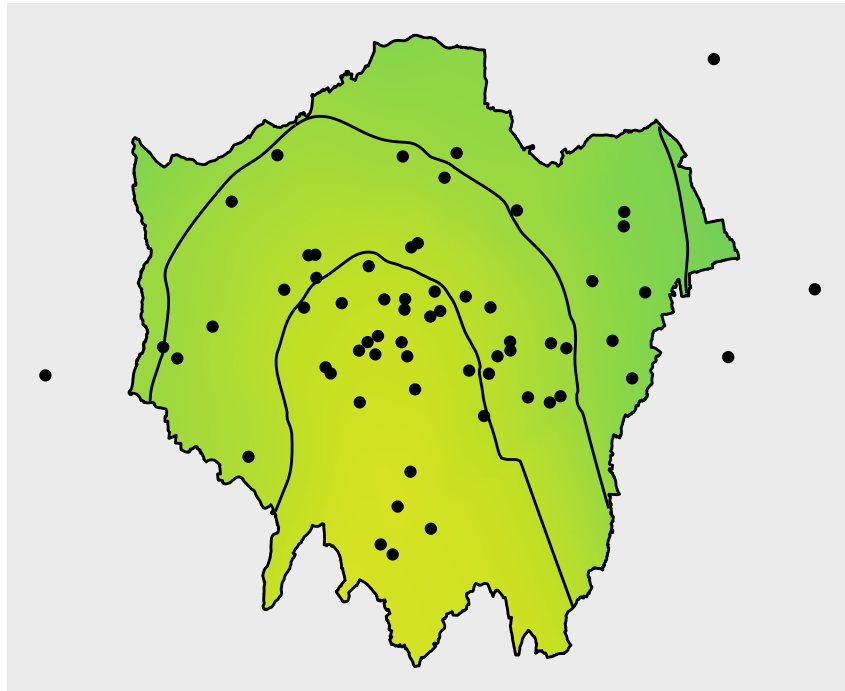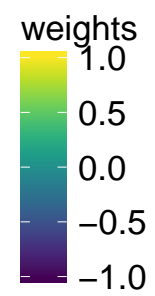

Supplement: Supplementary file 10 [file 2]

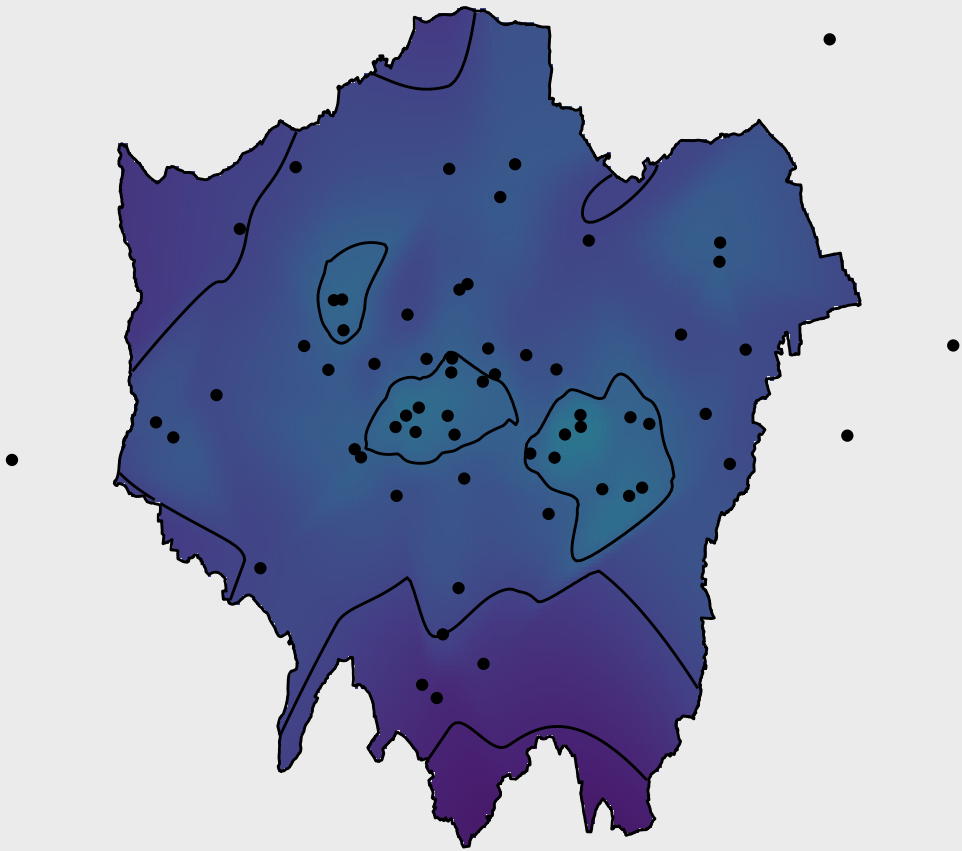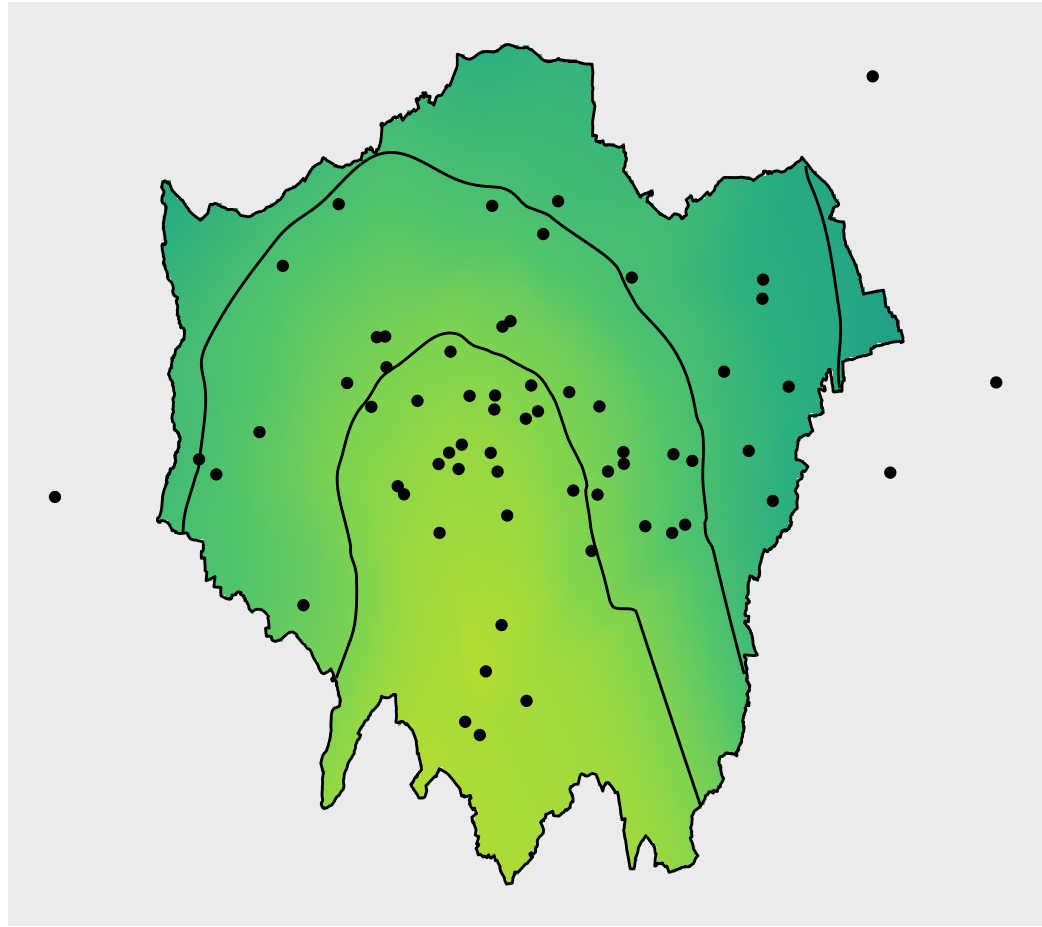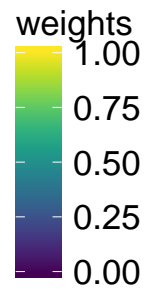

Supplement: Supplementary file 11 [file 2]

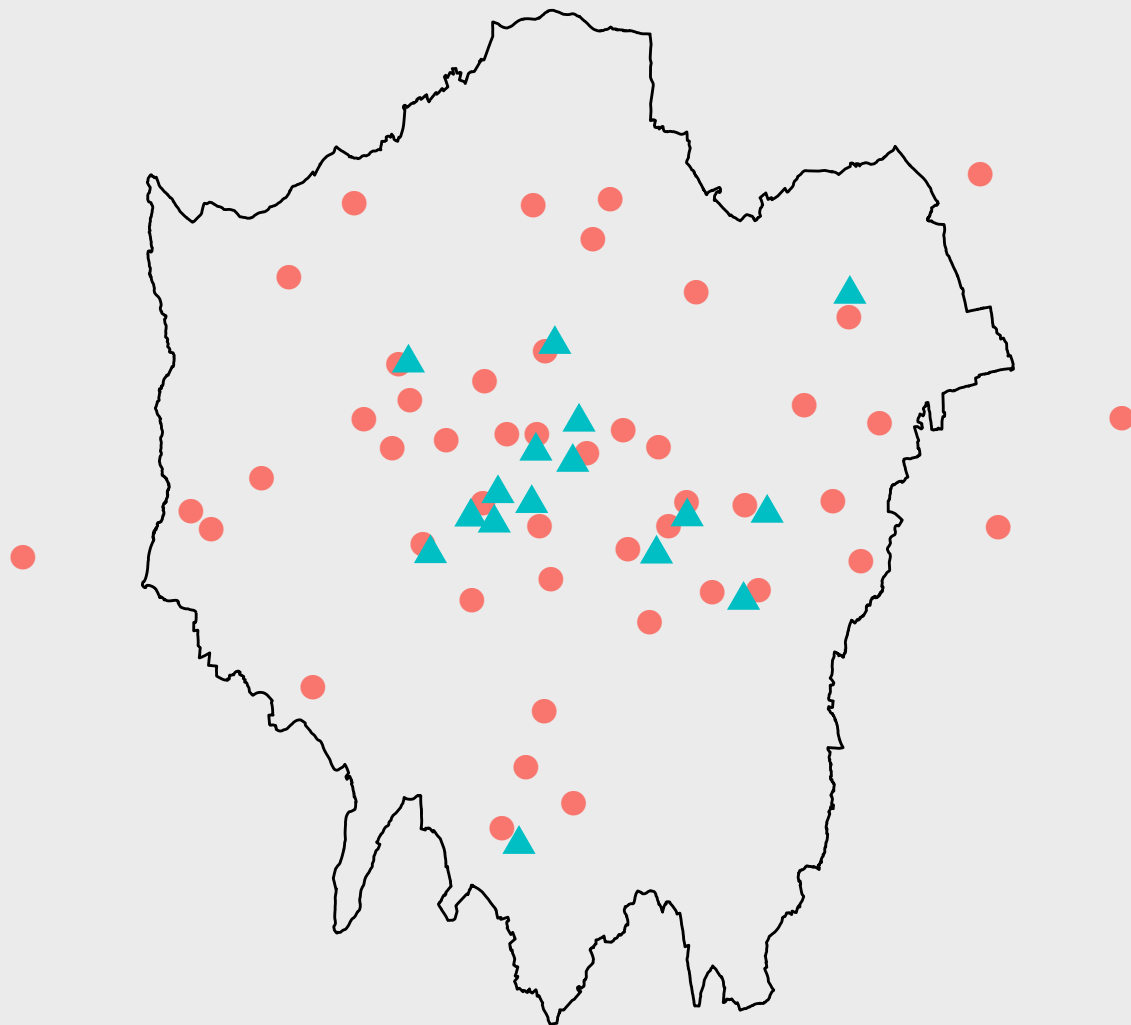

site

● fitting

▲ validation

Supplement: Supplementary file 12 [file 2]

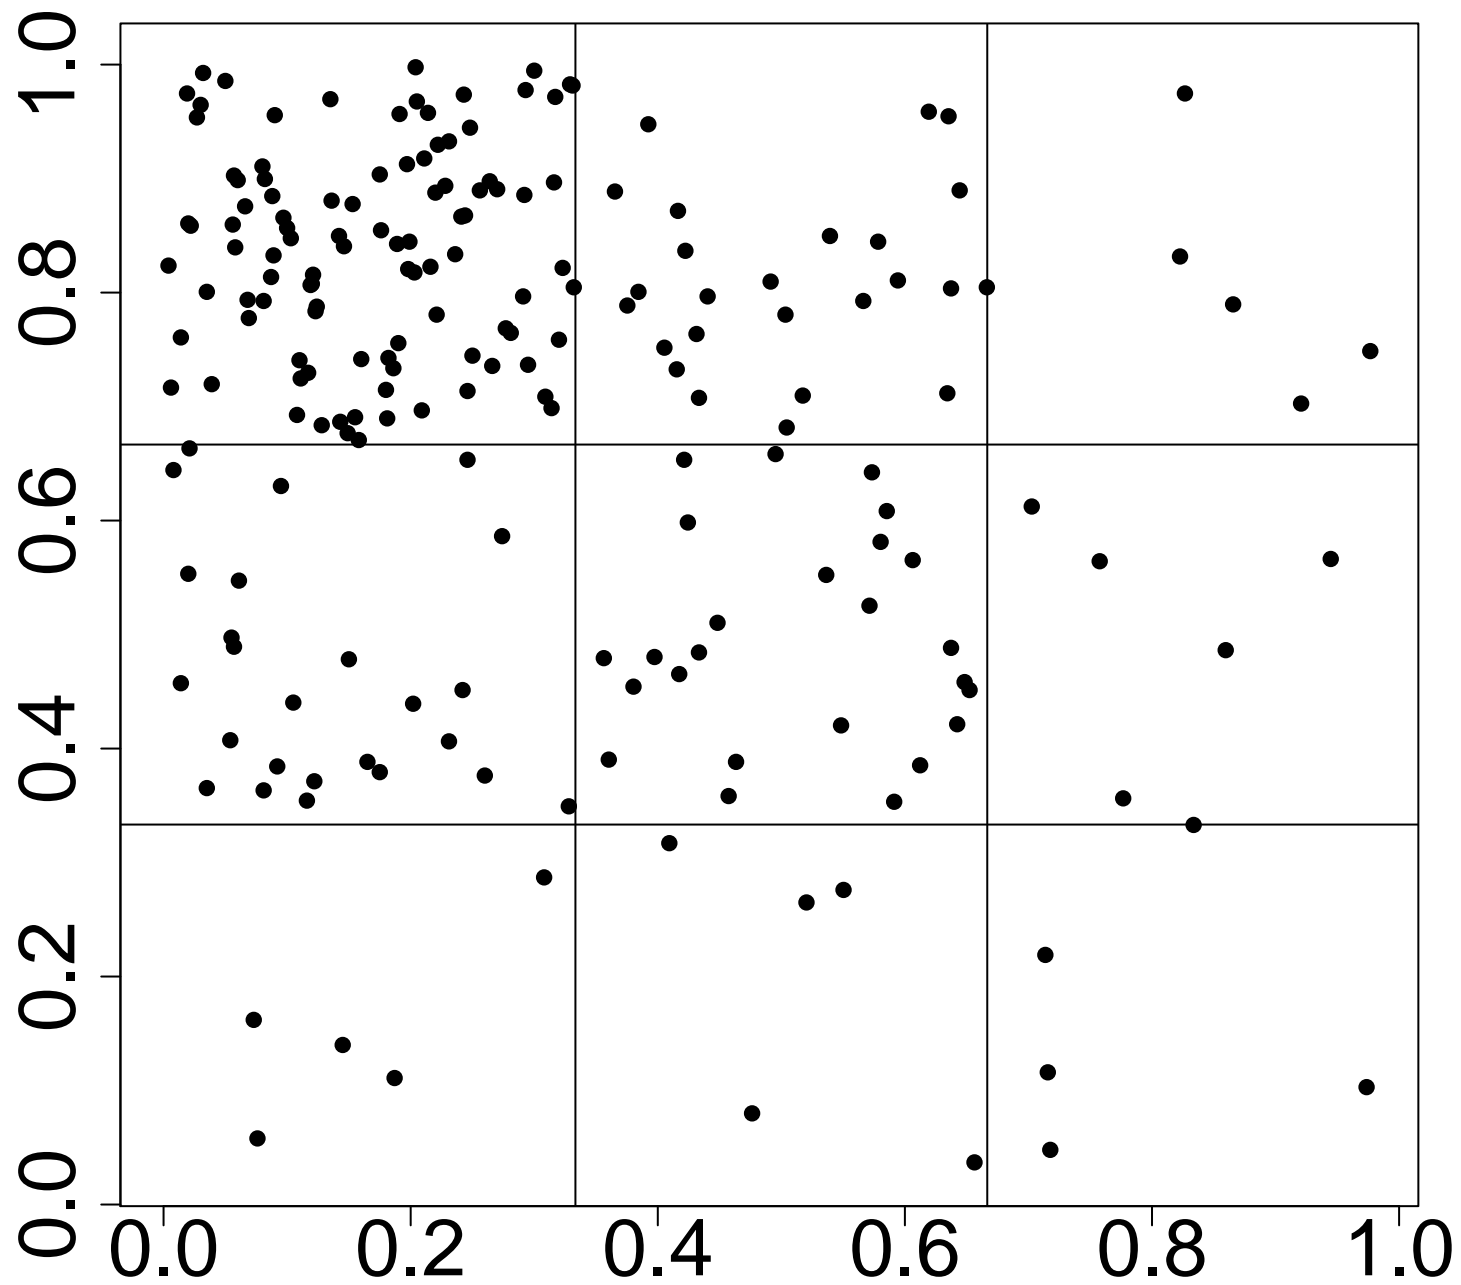

Supplement: Supplementary file 13 [file 2]

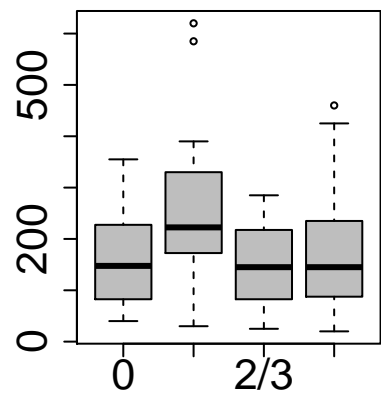

(a)

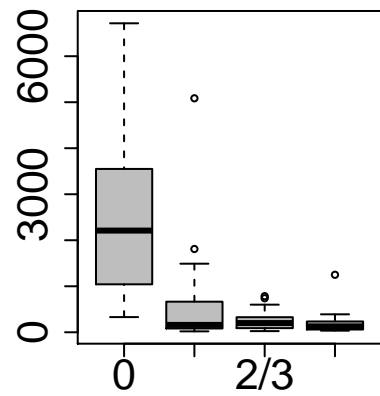

(b)

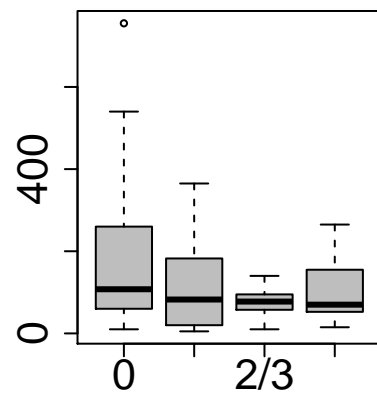

(c)

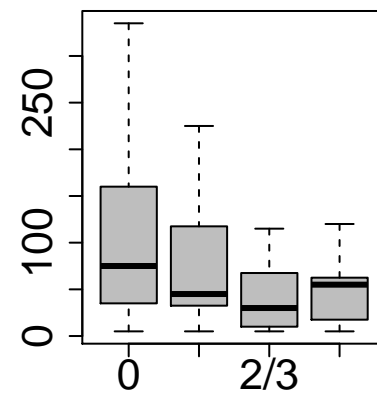

(d)

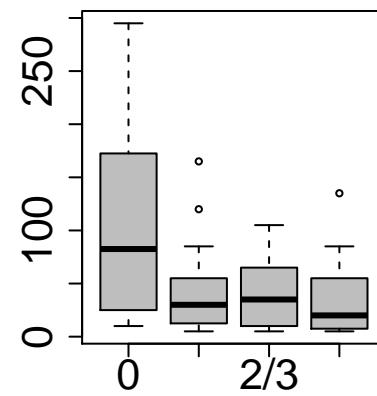

(e)

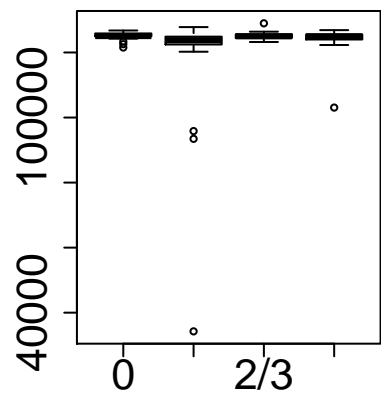

(f)

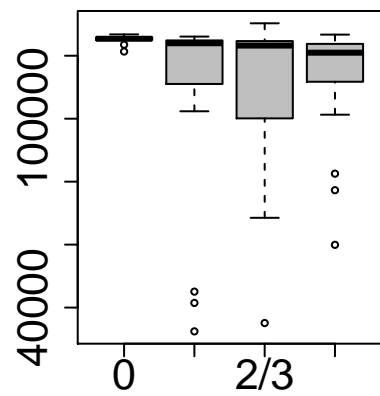

(g)

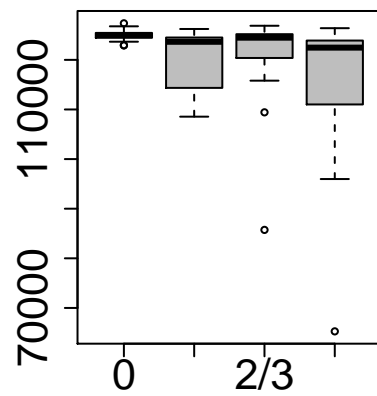

(h)

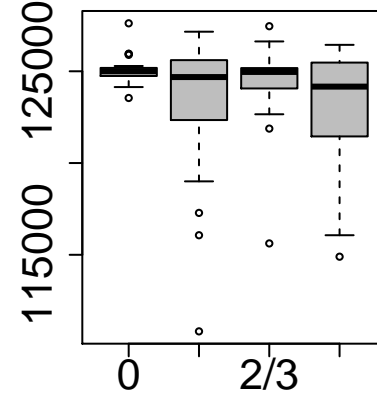

(i)

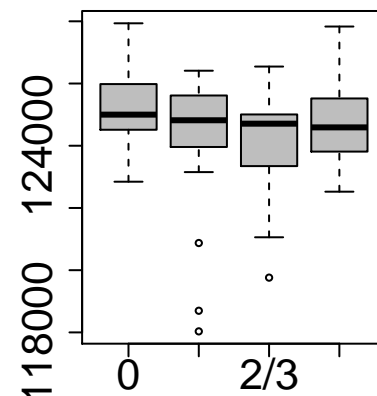

(j)

Supplement: Supplementary file 14 [file 2]
